# Supplementary material
Source: bioRxiv or medRxiv preprint supplement (https://www.biorxiv.org/highwire/filestream/115769/field_highwire_adjunct_files/3/381525-4.pdf)
Supplement: Supplementary file [file 381525-4.pdf]

## SUPPLEMENTAL TABLE 3: Part 2

|        |          |                                                      | Summary Difference |            |            |               |              |           |
|--------|----------|------------------------------------------------------|--------------------|------------|------------|---------------|--------------|-----------|
|        |          |                                                      | TMP vs. Vh         |            |            |               |              |           |
|        |          |                                                      | Average            | St. Dev.   | p-value    | q-value (Stor | High-confide | Secretary |
| XXXXXX |          | lambda LC JTO variable region                        |                    |            |            |               |              |           |
| P11021 | HSPA5    | 78 kDa glucose-regulated protein OS                  | 1.31105216         | 0.32190881 | 0.00017292 | 0.0100868     | TRUE         | TRUE      |
| Q9UBS4 | DNAJB11  | Dnaj homolog subfamily B member 11 OS                | 0.71305052         | 0.31569894 | 0.00264569 | 0.07716594    | TRUE         | TRUE      |
| P14625 | HSP90B1  | Endoplasmic OS                                       | 1.17318153         | 0.53577272 | 0.00303033 | 0.058923      | TRUE         | TRUE      |
| Q9Y4L1 | HYOU1    | Hypoxia up-regulated protein 1 OS                    | 0.74558769         | 0.35394058 | 0.00358494 | 0.05228039    | TRUE         | TRUE      |
| P13667 | PDIA4    | Protein disulfide-isomerase A4 OS                    | 1.4432979          | 0.79544865 | 0.00673686 | 0.07859674    | TRUE         | TRUE      |
| P30101 | PDIA3    | Protein disulfide-isomerase A3 OS                    | 0.45370485         | 0.27227708 | 0.00952424 | 0.09259677    | TRUE         | TRUE      |
| P07237 | P4HB     | Protein disulfide-isomerase OS                       | 0.37207058         | 0.23995466 | 0.01265245 | 0.10543705    | TRUE         | TRUE      |
| Q13724 | MOGS     | Mannosyl-oligosaccharide glucosidase OS              | 0.33984924         | 0.01512204 | 0.02002378 | 0.14600671    | TRUE         | TRUE      |
| Q15084 | PDIA6    | Protein disulfide-isomerase A6 OS                    | 0.45135144         | 0.33456715 | 0.02136911 | 0.13850346    | TRUE         | TRUE      |
| Q9B526 | ERP44    | Endoplasmic reticulum resident protein 44 OS         | 0.36532973         | 0.19345616 | 0.03251274 | 0.18965767    | TRUE         | TRUE      |
| Q96HE7 | ERO1L    | ERO1-like protein alpha OS                           | 0.35004586         | 0.24718484 | 0.06606645 | 0.35035236    | TRUE         | TRUE      |
| P23284 | PIPB     | Peptidyl-prolyl cis-trans isomerase B OS             | 0.25534553         | 0.27292409 | 0.07049748 | 0.34269608    | TRUE         | TRUE      |
| P27797 | CALR     | Calreticulin OS                                      | 0.69722866         | 0.77454138 | 0.07859872 | 0.35268656    | TRUE         | TRUE      |
| Q07065 | CKAP4    | Cytoskeleton-associated protein 4 OS                 | 0.30337374         | 0.33879933 | 0.07975766 | 0.33232357    | TRUE         | TRUE      |
| Q14257 | RCN2     | Reticulocalbin-2 OS                                  | 0.43510909         | 0.34638466 | 0.16155725 | 0.62827819    | TRUE         | TRUE      |
| P04844 | RPN2     | Dolichyl-diphosphooligosaccharide--protein glyco     | 0.27940959         | 0.30324193 | 0.16258166 | 0.59274564    | TRUE         | TRUE      |
| P55145 | MANF     | Mesencephalic astrocyte-derived neurotrophic fa      | 0.73852387         | 0.30355042 | 0.18006482 | 0.61786946    | TRUE         | TRUE      |
| Q05707 | COL14A1  | Collagen alpha-1(XIV) chain OS                       | 0.60175485         | 0.25283586 | 0.18385262 | 0.59581868    | TRUE         | TRUE      |
| Q96AY3 | FKBP10   | Peptidyl-prolyl cis-trans isomerase FKBP10 OS        | -0.1746588         | 0.08328883 | 0.20704289 | 0.63565798    | TRUE         | TRUE      |
| P39656 | DDOST    | Dolichyl-diphosphooligosaccharide--protein glyco     | 0.24306222         | 0.30848748 | 0.21314964 | 0.62168646    | TRUE         | TRUE      |
| Q969V3 | NCLN     | Nicalin OS                                           | 0.24397225         | 0.23805461 | 0.21787075 | 0.60519652    | TRUE         | TRUE      |
| Q8NBJ5 | GLT25D1  | Procollagen galactosyltransferase 1 OS               | -0.1448983         | 0.22927384 | 0.23048439 | 0.61113286    | TRUE         | TRUE      |
| Q9NYU2 | UGGT1    | UDP-glucose:glycoprotein glucosyltransferase 1 C     | 0.18116075         | 0.34325644 | 0.25260211 | 0.64065752    | TRUE         | TRUE      |
| P54652 | HSPA2    | Heat shock-related 70 kDa protein 2 OS               | 0.38483485         | 0.64433504 | 0.25263752 | 0.61404954    | TRUE         | FALSE     |
| O43405 | COCH     | Cochlin OS                                           | 0.22877935         | 0.26492962 | 0.27337499 | 0.63787498    | TRUE         | FALSE     |
| Q16706 | MAN2A1   | Alpha-mannosidase 2 OS                               | 0.3175025          | 0.20650453 | 0.27442114 | 0.61568845    | TRUE         | TRUE      |
| P34931 | HSPA1L   | Heat shock 70 kDa protein 1-like OS                  | 0.66028508         | 0.79185842 | 0.28550069 | 0.61682248    | TRUE         | FALSE     |
| Q13217 | DNAJC3   | Dnaj homolog subfamily C member 3 OS                 | 0.61987617         | 0.45538464 | 0.30500459 | 0.63542624    | TRUE         | TRUE      |
| Q14697 | GANAB    | Neutral alpha-glucosidase AB OS                      | -0.1108859         | 0.23875733 | 0.3068411  | 0.6172091     | TRUE         | TRUE      |
| O60568 | PLOD3    | Procollagen-lysine,2-oxoglutarate 5-dioxygenase      | 0.19580326         | 0.25046376 | 0.30842352 | 0.59971239    | TRUE         | TRUE      |
| Q32P28 | LEPRE1   | Prolyl 3-hydroxylase 1 OS                            | 0.13413125         | 0.18006844 | 0.32602997 | 0.61349725    | TRUE         | TRUE      |
| Q8NBJ4 | GOLM1    | Golgi membrane protein 1 OS                          | 0.27915594         | 0.37942869 | 0.33059297 | 0.60264344    | TRUE         | TRUE      |
| P13674 | P4HA1    | Prolyl 4-hydroxylase subunit alpha-1 OS              | 0.16413869         | 0.23841798 | 0.35538599 | 0.62820756    | TRUE         | TRUE      |
| P53396 | ACLY     | ATP-citrate synthase OS                              | 0.27568537         | 0.50864979 | 0.35770989 | 0.61371794    | TRUE         | FALSE     |
| Q9Y2B0 | CNPY2    | Protein canopy homolog 2 OS                          | 0.1234496          | 0.25194452 | 0.39936588 | 0.66560981    | TRUE         | TRUE      |
| P49257 | LMAN1    | Protein ERGIC-53 OS                                  | 0.06655178         | 0.17270643 | 0.43746553 | 0.70885618    | TRUE         | TRUE      |
| P40227 | CCT6A    | T-complex protein 1 subunit zeta OS                  | 0.37328646         | 0.46856152 | 0.46213047 | 0.72858408    | TRUE         | FALSE     |
| P23526 | AHCY     | Adenosylhomocysteinase OS                            | 0.46428679         | 0.59503559 | 0.46871137 | 0.71951306    | TRUE         | FALSE     |
| P27824 | CANX     | Calnexin OS                                          | 0.18645044         | 0.5881454  | 0.47255678 | 0.7068157     | TRUE         | TRUE      |
| O76094 | SRP72    | Signal recognition particle 72 kDa protein OS        | 0.2755247          | 0.54889499 | 0.4762787  | 0.6945731     | TRUE         | TRUE      |
| Q2VIR3 | EIF2S3L  | Eukaryotic translation initiation factor 2 subunit 3 | -0.3802887         | 0.5219771  | 0.49049017 | 0.69785187    | TRUE         | FALSE     |
| P50454 | SERPINH1 | Serpin H1 OS                                         | 0.15026904         | 0.31299151 | 0.49312601 | 0.68489724    | TRUE         | TRUE      |
| Q9Y490 | TLN1     | Talin-1 OS                                           | 0.25422956         | 0.70282094 | 0.521707   | 0.70774206    | TRUE         | FALSE     |
| Q08380 | LGALS3BP | Galectin-3-binding protein OS                        | 0.08045638         | 0.28851817 | 0.52492362 | 0.69592146    | TRUE         | FALSE     |
| P04843 | RPN1     | Dolichyl-diphosphooligosaccharide--protein glyco     | 0.11345606         | 0.41823474 | 0.53579494 | 0.694549      | TRUE         | TRUE      |
| O14737 | PDCD5    | Programmed cell death protein 5 OS                   | -0.2616822         | 0.88218301 | 0.54342081 | 0.68912059    | TRUE         | FALSE     |
| O94905 | ERLIN2   | Erlin-2 OS                                           | 0.18646451         | 0.32644079 | 0.56742816 | 0.70425481    | TRUE         | TRUE      |
| O75718 | CARTAP   | Cartilage-associated protein OS                      | 0.1322736          | 0.23705961 | 0.57470133 | 0.69842176    | TRUE         | TRUE      |
| O43493 | TGOLN2   | Trans-Golgi network integral membrane protein 2      | -0.0981431         | 0.26189645 | 0.58287394 | 0.69389755    | TRUE         | TRUE      |
| Q92896 | GLG1     | Golgi apparatus protein 1 OS                         | 0.20547331         | 0.3797271  | 0.58416961 | 0.68153121    | TRUE         | TRUE      |
| Q71U36 | TUBA1A   | Tubulin alpha-1A chain OS                            | 0.2026083          | 0.57892866 | 0.60603886 | 0.69318171    | TRUE         | FALSE     |
| O75976 | CPD      | Carboxypeptidase D OS                                | 0.05891435         | 0.27048611 | 0.61652776 | 0.69161768    | TRUE         | FALSE     |
| Q9H3N1 | TMX1     | Thioredoxin-related transmembrane protein 1 OS       | 0.12686707         | 0.39428325 | 0.63336092 | 0.69709535    | TRUE         | TRUE      |
| P46977 | STT3A    | Dolichyl-diphosphooligosaccharide--protein glyco     | 0.11023969         | 0.41871142 | 0.63494505 | 0.68589743    | TRUE         | TRUE      |
| Q07955 | SRSF1    | Serine/arginine-rich splicing factor 1 OS            | 0.18121263         | 0.69513638 | 0.6381495  | 0.67682523    | TRUE         | FALSE     |
| O43852 | CALU     | Calumenin OS                                         | 0.05835827         | 0.19159223 | 0.65047664 | 0.67757984    | TRUE         | TRUE      |
| P49458 | SRP9     | Signal recognition particle 9 kDa protein OS         | 0.18806996         | 0.6385274  | 0.66067045 | 0.67612473    | TRUE         | FALSE     |
| P68371 | TUBB2C   | Tubulin beta-2C chain OS                             | 0.2446049          | 0.62757025 | 0.67928852 | 0.68319248    | TRUE         | FALSE     |
| Q14204 | DYNC1H1  | Cytoplasmic dynein 1 heavy chain 1 OS                | 0.18531382         | 0.84349712 | 0.69010074 | 0.68230299    | TRUE         | FALSE     |
| Q9NXG2 | THUMPD1  | THUMP domain-containing protein 1 OS                 | 0.13555158         | 0.51932142 | 0.69550172 | 0.67618223    | TRUE         | FALSE     |
| Q8NBS9 | TXNDC5   | Thioredoxin domain-containing protein 5 OS           | 0.03260862         | 0.17880917 | 0.73950686 | 0.70717869    | TRUE         | TRUE      |
| Q8IXB1 | DNAJC10  | Dnaj homolog subfamily C member 10 OS                | 0.07214332         | 0.44168173 | 0.80383943 | 0.75630054    | TRUE         | TRUE      |
| P30040 | ERP29    | Endoplasmic reticulum resident protein 29 OS         | -0.0385062         | 0.40154825 | 0.84070256 | 0.77842829    | TRUE         | TRUE      |
| P02786 | TFR      | Transferrin receptor protein 1 OS                    | 0.02230464         | 0.28924188 | 0.90597329 | 0.8257569     | TRUE         | FALSE     |
| P14314 | PRKCSH   | Glucosidase 2 subunit beta OS                        | 0.01387679         | 0.31010392 | 0.91698061 | 0.82293132    | TRUE         | TRUE      |
| O75477 | ERLIN1   | Erlin-1 OS                                           | 0.01331446         | 0.27210514 | 0.94017895 | 0.83096625    | TRUE         | TRUE      |
| Q13162 | PRDX4    | Peroxisredoxin-4 OS                                  | -0.0049178         | 0.21271192 | 0.96124902 | 0.83690835    | TRUE         | FALSE     |
| P49207 | PLP34    | 60S ribosomal protein L34 OS                         | 0.02791023         | 0.88613381 | 0.96145333 | 0.82477614    | TRUE         | FALSE     |
| Q02809 | LOD1     | Procollagen-lysine,2-oxoglutarate 5-dioxygenase      | 0.00327545         | 0.36646473 | 0.98686025 | 0.83430215    | TRUE         | TRUE      |
| Q15293 | RCN1     | Reticulocalbin-1 OS                                  | -0.0019609         | 0.32618076 | 0.99116202 | 0.82596835    | TRUE         | TRUE      |
